# Supplementary material for: Characterization of ovarian cancer-derived extracellular vesicles by surface-enhanced Raman spectroscopy
Source: Royal Society of Chemistry journal article supplement (doi:10.1039/d1an01586a), 2021-01-01
Supplement: d1an01586a1.pdf [file d1an01586a1.pdf]

# Characterization of Ovarian Cancer-Derived Extracellular Vesicles by Surface-Enhanced Raman Spectroscopy – Supplementary Information

*Nina M. Culum,<sup>1</sup> Tyler T. Cooper,<sup>2</sup> Gilles A. Lajoie,<sup>2</sup> Tamara Dayarathna,<sup>3</sup> Stephen H. Pasternak,<sup>3</sup> Jiahui Liu,<sup>4</sup> Yangxin Fu,<sup>4</sup> Lynne-Marie Postovit,<sup>4,5</sup> François Laguné-Labarthe\*<sup>1</sup>*

<sup>1</sup> University of Western Ontario (Western University), Department of Chemistry, 1151  
Richmond St., London, Ontario, Canada, N6A 5B7

<sup>2</sup> University of Western Ontario (Western University), Department of Biochemistry, 1151  
Richmond St., London, Ontario, Canada, N6A 5B7

<sup>3</sup> University of Western Ontario (Western University), Robarts Research Institute, 1151  
Richmond St., London, Ontario, Canada, N6A 5B7

<sup>4</sup> University of Alberta, Department of Oncology, 116 St. & 85 Ave., Edmonton, Alberta,  
Canada, T6G 2R3

<sup>5</sup> Queen's University, Department of Biomedical & Molecular Sciences, 99 University Ave.,  
Kingston, Ontario, Canada, K7L 3N6

**Table S1.** Parameters for Q Exactive Plus.

| <b>Parameter</b>                        | <b>Parameter Setting</b>          |
|-----------------------------------------|-----------------------------------|
| Orbitrap Resolution (MS1)               | $7 \times 10^4$                   |
| Mass Range                              | 400 – 1500 m/z                    |
| MS1 Injection Time                      | 200 ms                            |
| MS1 Automatic Gain Control (AGC) Target | $3 \times 10^6$ ions/cycle        |
| Lock Mass                               | 445.120025 m/z                    |
| MS2 Detection                           | Fourier Transform                 |
| MS2 Resolution                          | $1.75 \times 10^4$                |
| MS2 AGC Target                          | $2 \times 10^5$ ions/cycle        |
| MS2 Injection Time                      | 50 ms                             |
| Loop Count                              | 12                                |
| Isolation Width                         | 1.2 m/z                           |
| Isolation Offset                        | 0.5 m/z                           |
| MS2 Activation                          | Higher-energy C-trap dissociation |
| Normalized Collision Energy             | 25 %                              |
| Dynamic Exclusion                       | 12                                |
| Minimum AGC Target                      | $2 \times 10^3$ ions/cycle        |
| MS2 Intensity Threshold                 | $8 \times 10^4$                   |
| Exclusion Duration                      | 30 s                              |
| Charge Exclusion                        | Unassigned, 1, 8, >8              |
| Polarity                                | Positive                          |

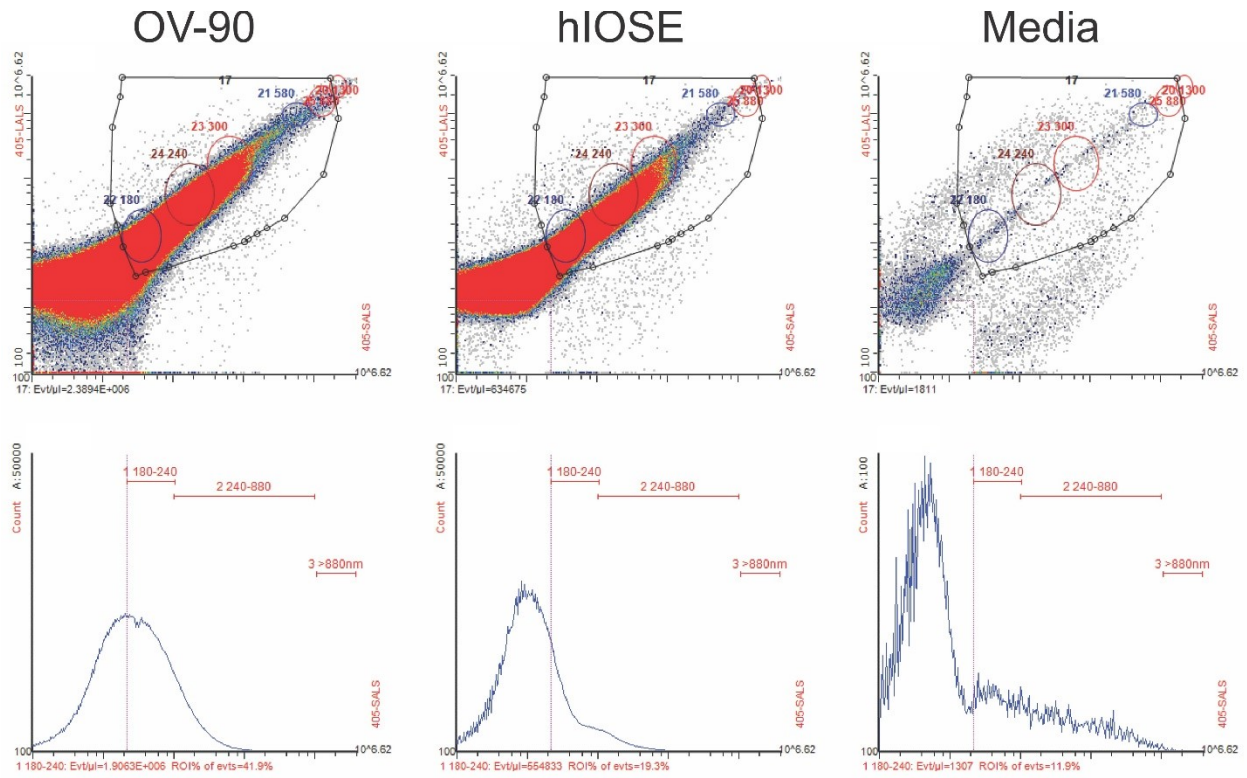

**Figure S1.** Representative flow cytometry plots (top) and corresponding size distributions (bottoms) of EV samples from OV-90 (left) and hIOSE (middle) cell lines, as well as conditioned media (right).

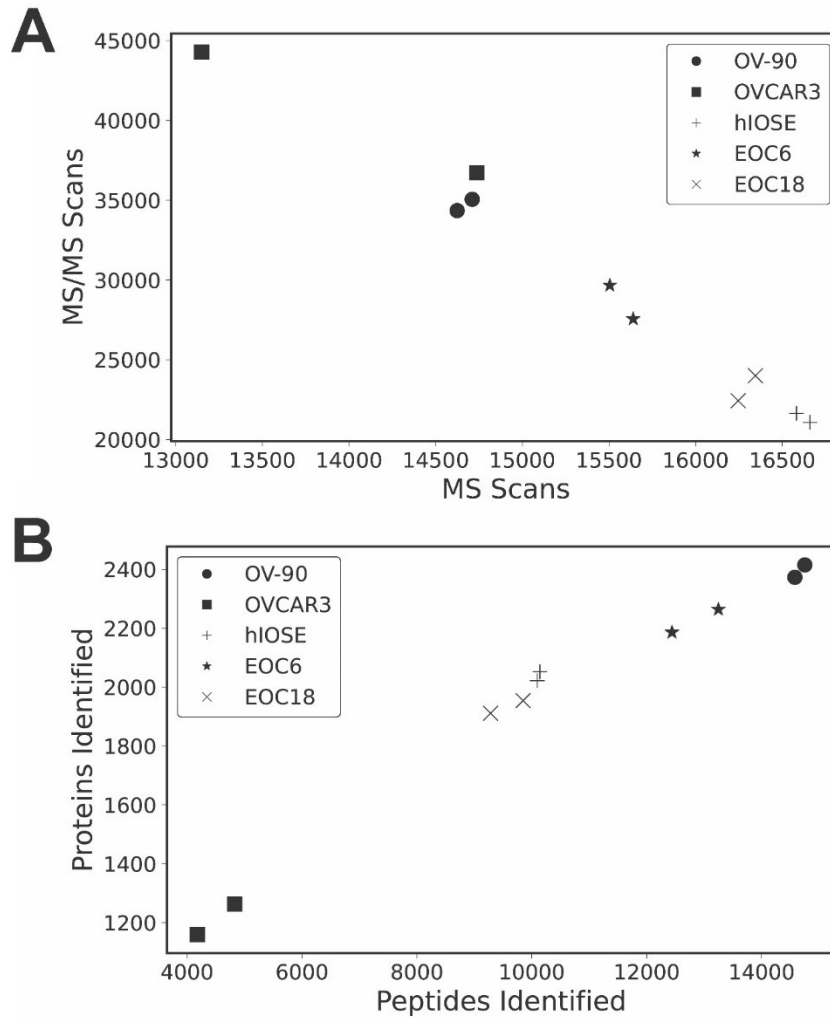

**Figure S2. (A)** Number of MS1 and MS2 scans for duplicate injections of each EV sample. **(B)** Number of peptides identified by de novo sequencing, which led to confident protein identification with false discovery rate ( $p < 0.01$ ).

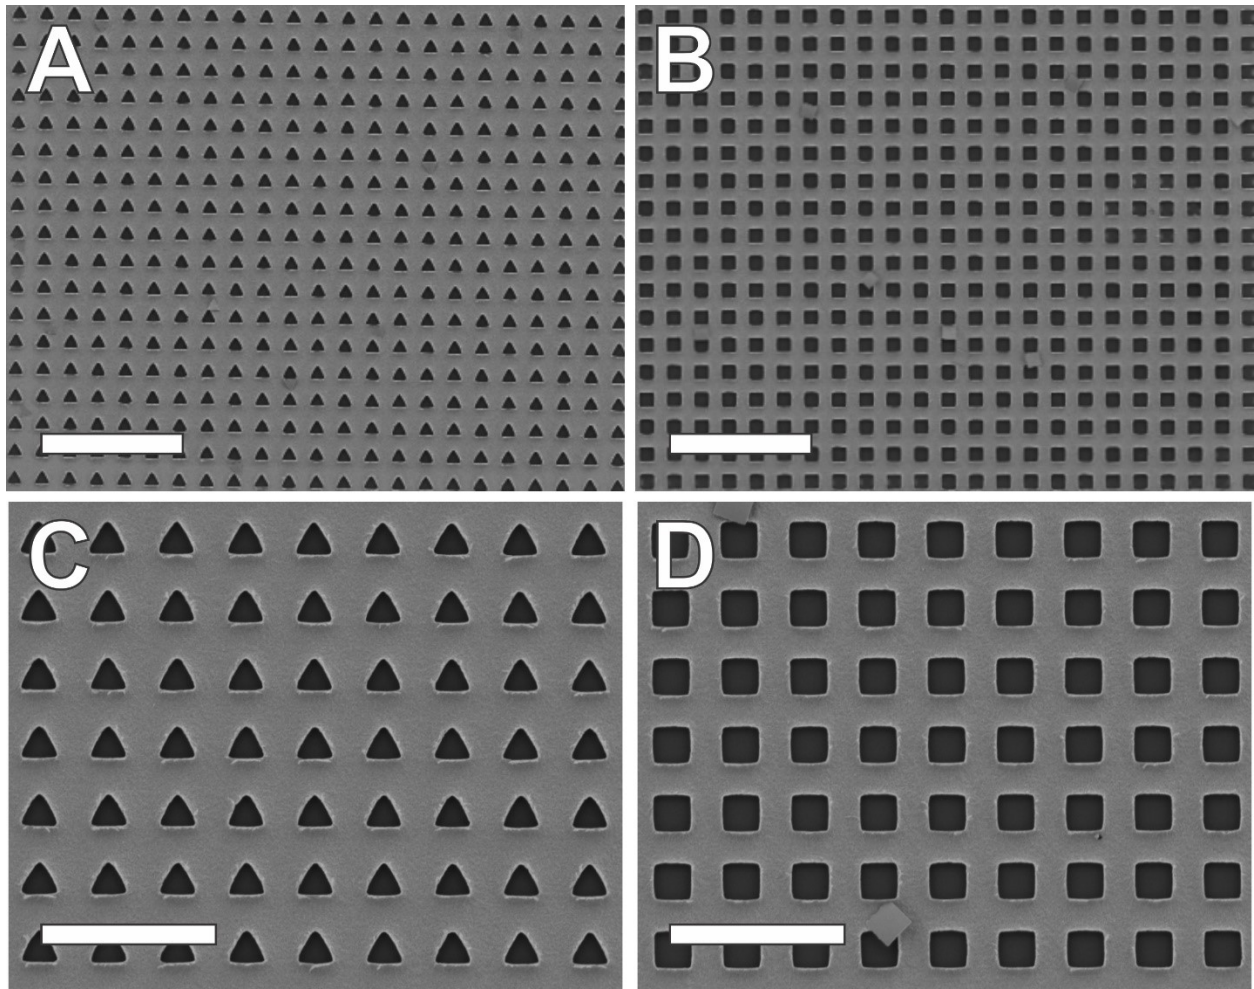

**Figure S3.** SEM images of typical nanohole arrays (edge length = 1.0  $\mu\text{m}$ ) used for EV capture and analysis, including (A) triangular arrays and (B) square arrays (scale bars = 10  $\mu\text{m}$ ). (C) and (D) represent magnified images of (A) and (B), respectively (scale bars = 5  $\mu\text{m}$ ).

**Table S2.** Summary of peak assignments of hIOSE EVs, as highlighted in **Fig. 3A**.

| <b>Raman Shift (cm<sup>-1</sup>)</b> | <b>Presumed Assignment</b>                                                                       | <b>Ref. Peak (cm<sup>-1</sup>)</b> |
|--------------------------------------|--------------------------------------------------------------------------------------------------|------------------------------------|
| 630                                  | Glycerol                                                                                         | 630 <sup>1,2</sup>                 |
| 692                                  | Ring deformation                                                                                 | 686 <sup>2</sup>                   |
| 724                                  | Ring breathing mode of adenine                                                                   | 725 <sup>1,2</sup>                 |
| 755                                  | Symmetric breathing of tryptophan                                                                | 755 <sup>2</sup>                   |
| 787                                  | Ring breathing mode of cytosine, uracil, thymine                                                 | 786 <sup>1,2</sup>                 |
| 818                                  | C-C stretching in collagen                                                                       | 817 <sup>1,2</sup>                 |
| 837                                  | Deformative vibrations of amine groups                                                           | 838 <sup>1,2</sup>                 |
| 865                                  | C-C stretching or C-O-C skeletal mode in carbohydrates                                           | 868 <sup>1,2</sup>                 |
| 935                                  | C-C stretching mode of proline, valine, and protein backbone ( $\alpha$ -helix); glycogen        | 935 <sup>1,2</sup>                 |
| 961                                  | Unassigned in protein assignments                                                                | 963 <sup>1,2</sup>                 |
| 1029                                 | Phenylalanine of collagen                                                                        | 1030 <sup>2</sup>                  |
| 1090                                 | Symmetric phosphate stretching vibrations                                                        | 1090 <sup>1,2</sup>                |
| 1185                                 | Cytosine, guanine, adenine                                                                       | 1180 – 1184 <sup>1,2</sup>         |
| 1254                                 | Lipids                                                                                           | 1255 <sup>1,2</sup>                |
| 1303                                 | CH <sub>2</sub> /CH <sub>3</sub> twisting, wagging, or bending mode of lipid/collagen; amide III | 1302 <sup>1,2</sup>                |
| 1356                                 | Guanine                                                                                          | 1355, 1357 <sup>1,2</sup>          |
| 1404                                 | C-H deformation                                                                                  | 1404 <sup>1</sup>                  |
| 1455                                 | Deoxyribose; CH <sub>2</sub> scissoring of proteins and lipids                                   | 1455 <sup>2</sup>                  |
| 1482                                 | Ring breathing mode of guanine, adenine                                                          | 1485 <sup>1,2</sup>                |
| 1545                                 | Amide II                                                                                         | 1544 <sup>1</sup>                  |

**Table S3.** Summary of peak assignments of OV-90 EVs, as highlighted in **Fig. 3B**.

| <b>Raman Shift (cm<sup>-1</sup>)</b> | <b>Presumed Assignment</b>                                                                                                                 | <b>Ref. Peak (cm<sup>-1</sup>)</b> |
|--------------------------------------|--------------------------------------------------------------------------------------------------------------------------------------------|------------------------------------|
| 632                                  | Glycerol                                                                                                                                   | 630 <sup>1,2</sup> *               |
| 675                                  | Ring breathing mode in guanine                                                                                                             | 678 <sup>1,2</sup>                 |
| 714                                  | C-N (membrane phospholipid head); adenine                                                                                                  | 717 <sup>2</sup>                   |
| 719                                  | C-N (membrane phospholipid head), symmetric stretch vibration of choline group N <sup>+</sup> (CH <sub>3</sub> ) <sub>3</sub> ; nucleotide | 719 <sup>1,2</sup>                 |
| 755                                  | Symmetric breathing of tryptophan                                                                                                          | 755 <sup>2</sup> *                 |
| 782                                  | Ring breathing in thymine, cytosine, uracil                                                                                                | 782 <sup>1,2</sup>                 |
| 822                                  | Phosphodiester                                                                                                                             | 822 <sup>1,2</sup>                 |
| 908                                  | Tyrosine                                                                                                                                   | 906 <sup>1</sup>                   |
| 943                                  | Skeletal modes in polysaccharides                                                                                                          | 941 <sup>1,2</sup>                 |
| 1008                                 | Phenylalanine                                                                                                                              | 1008 <sup>1,2</sup>                |
| 1036                                 | C-H in-plane bending mode of phenylalanine                                                                                                 | 1036 <sup>2</sup>                  |
| 1118                                 | Glucose                                                                                                                                    | 1117 <sup>1,2</sup>                |
| 1151                                 | C-N stretching in proteins                                                                                                                 | 1152 <sup>1,2</sup>                |
| 1186                                 | Cytosine, guanine, adenine                                                                                                                 | 1180 – 1184 <sup>1,2</sup> *       |
| 1201                                 | Nucleic acids and phosphates; aromatic C-O and C-N                                                                                         | 1200 <sup>1,2</sup>                |
| 1220                                 | C=N=C stretching                                                                                                                           | 1220 <sup>1,2</sup>                |
| 1274                                 | Amide III                                                                                                                                  | 1275 <sup>1,2</sup>                |
| 1335                                 | CH <sub>2</sub> /CH <sub>3</sub> twisting and wagging in collagen and nucleic acids; C-N stretching in amide III                           | 1335 <sup>1,2</sup>                |
| 1370                                 | Saccharide band                                                                                                                            | 1370 <sup>1,2</sup>                |
| 1403                                 | C-H deformation                                                                                                                            | 1404 <sup>1</sup> *                |
| 1467                                 | Lipids                                                                                                                                     | 1465 <sup>1,2</sup>                |
| 1533                                 | Amide II                                                                                                                                   | 1542 <sup>1</sup>                  |

\* Also present in control (hIOSE) spectrum.

**Table S4.** Summary of peak assignments of OVCAR3 EVs, as highlighted in **Fig. 3B**.

| <b>Raman Shift (cm<sup>-1</sup>)</b> | <b>Presumed Assignment</b>                                                                | <b>Ref. Peak (cm<sup>-1</sup>)</b> |
|--------------------------------------|-------------------------------------------------------------------------------------------|------------------------------------|
| 675                                  | Ring breathing mode in guanine                                                            | 678 <sup>1,2</sup>                 |
| 687                                  | Ring deformation                                                                          | 686 <sup>2</sup> *                 |
| 724                                  | Ring breathing mode of adenine                                                            | 725 <sup>1,2</sup> *               |
| 741                                  | DNA, tryptophan                                                                           | 742 <sup>1</sup>                   |
| 818                                  | C-C stretching in collagen                                                                | 817 <sup>1,2</sup> *               |
| 848                                  | C-O-C skeletal mode in carbohydrates                                                      | 847 <sup>1,2</sup>                 |
| 929                                  | Carbohydrates                                                                             | 931 <sup>1,2</sup>                 |
| 935                                  | C-C stretching mode of proline, valine, and protein backbone ( $\alpha$ -helix); glycogen | 935 <sup>1,2</sup> *               |
| 956                                  | CH <sub>3</sub> stretching in proteins ( $\alpha$ -helix)                                 | 951 <sup>1,2</sup>                 |
| 994                                  | C-O ribose, C-C                                                                           | 996 <sup>1,2</sup>                 |
| 1055                                 | C-O stretching, C-N stretching in proteins                                                | 1053 <sup>1,2</sup>                |
| 1176                                 | C-H bending in tyrosine                                                                   | 1176 <sup>1</sup>                  |
| 1197                                 | Tryptophan ring breathing                                                                 | 1199 <sup>1</sup>                  |
| 1226                                 | Amide III ( $\beta$ -sheet)                                                               | 1224 <sup>1,2</sup>                |
| 1299                                 | Acyl chains, fatty acids                                                                  | 1298 <sup>1,2</sup>                |
| 1324                                 | CH <sub>2</sub> /CH <sub>3</sub> wagging mode in collagen and purine bases                | 1324 <sup>1,2</sup>                |
| 1346                                 | Adenine and guanine; C-H deformation of proteins                                          | 1344 <sup>2</sup>                  |
| 1376                                 | Ring breathing mode of adenine                                                            | 1376 <sup>2</sup>                  |
| 1455                                 | Deoxyribose; CH <sub>2</sub> scissoring of proteins and lipids                            | 1455 <sup>2</sup> *                |
| 1483                                 | Ring breathing mode of guanine, adenine                                                   | 1485 <sup>1,2</sup> *              |
| 1529                                 | -C=C- in-plane vibrations                                                                 | 1525 <sup>1,2</sup>                |
| 1584                                 | C=C bending mode of phenylalanine                                                         | 1583 <sup>1,2</sup>                |

\* Also present in control (hIOSE) spectrum.



**Table S5.** Summary of peak assignments of EOC6 EVs, as highlighted in **Fig. 3C**.

| <b>Raman Shift (cm<sup>-1</sup>)</b> | <b>Presumed Assignment</b>                                                         | <b>Ref. Peak (cm<sup>-1</sup>)</b> |
|--------------------------------------|------------------------------------------------------------------------------------|------------------------------------|
| 639                                  | Tyrosine ring breathing                                                            | 639 <sup>1</sup>                   |
| 694                                  | Ring deformation                                                                   | 686 <sup>2</sup> *                 |
| 736                                  | Phosphatidylserine                                                                 | 733 <sup>1,2</sup>                 |
| 775                                  | Phosphatidylinositol                                                               | 776 <sup>1,2</sup>                 |
| 797                                  | Ring breathing mode in uracil                                                      | 802 <sup>1,2</sup>                 |
| 845                                  | C-O-C skeletal mode in carbohydrates                                               | 847 <sup>1,2</sup>                 |
| 886                                  | Ring deformation and symmetric C-N-C stretching                                    | 886 <sup>2</sup>                   |
| 939                                  | C-C skeletal stretching in proteins                                                | 939 <sup>2</sup>                   |
| 1003                                 | C-C skeletal mode, phenylalanine                                                   | 1003 <sup>1,2</sup>                |
| 1023                                 | Glycogen                                                                           | 1023 <sup>1,2</sup>                |
| 1096                                 | Phosphodioxy group (PO <sub>2</sub> <sup>-</sup> in nucleic acids)                 | 1096 <sup>1,2</sup>                |
| 1159                                 | C-C/C-N stretching in proteins                                                     | 1158 <sup>1</sup>                  |
| 1162                                 | Tyrosine                                                                           | 1163 <sup>1</sup>                  |
| 1225                                 | Amide III (β-sheet)                                                                | 1224 <sup>1,2</sup>                |
| 1265                                 | Amide III of collagen; C-C <sub>6</sub> H <sub>5</sub> stretching in phenylalanine | 1265 <sup>2</sup>                  |
| 1332                                 | C-C stretching in phenyls, C-O stretching, C-H in-plane bending                    | 1332 <sup>1,2</sup>                |
| 1367                                 | CH <sub>3</sub> stretching in phospholipids                                        | 1367 <sup>1,2</sup>                |
| 1404                                 | C-H deformation                                                                    | 1404 <sup>1</sup> *                |
| 1439                                 | CH <sub>2</sub> /CH <sub>3</sub> deformation in collagen                           | 1439 <sup>1,2</sup>                |
| 1520                                 | -C=C- in-plane vibrations                                                          | 1525 <sup>1,2</sup>                |
| 1558                                 | Tryptophan, tyrosine, amide II                                                     | 1558 <sup>1,2</sup>                |

\* Also present in control (hIOSE) spectrum.

**Table S6.** Summary of peak assignments of EOC18 EVs, as highlighted in **Fig. 3C**.

| <b>Raman Shift (cm<sup>-1</sup>)</b> | <b>Presumed Assignment</b>                                                                             | <b>Ref. Peak (cm<sup>-1</sup>)</b> |
|--------------------------------------|--------------------------------------------------------------------------------------------------------|------------------------------------|
| 612                                  | Cholesterol ester                                                                                      | 614 <sup>1,2</sup>                 |
| 648                                  | Ring, cyclic deformation                                                                               | 649 <sup>2</sup>                   |
| 677                                  | Ring breathing in guanine                                                                              | 678 <sup>1,2</sup>                 |
| 756                                  | Symmetric breathing of tryptophan                                                                      | 755 <sup>2</sup> *                 |
| 835                                  | Deformative vibrations of amine groups                                                                 | 838 <sup>1,2</sup> *               |
| 852                                  | Proline, hydroxyproline, tyrosine                                                                      | 852 <sup>1,2</sup>                 |
| 935                                  | C-C stretching mode of proline, valine, and protein backbone ( $\alpha$ -helix); glycogen              | 935 <sup>1,2</sup> *               |
| 987                                  | Phenylalanine                                                                                          | 991 <sup>1</sup>                   |
| 1032                                 | CH <sub>2</sub> /CH <sub>3</sub> bending modes of phenylalanine and proline of collagen, phospholipids | 1032 <sup>1,2</sup>                |
| 1076                                 | Symmetric stretching of PO <sub>4</sub> <sup>3-</sup>                                                  | 1076 <sup>1</sup>                  |
| 1166                                 | Lipids                                                                                                 | 1168 <sup>1,2</sup>                |
| 1209                                 | C-C <sub>6</sub> H <sub>5</sub> stretching mode in tryptophan and phenylalanine                        | 1209 <sup>1,2</sup>                |
| 1248                                 | Amide III                                                                                              | 1248 <sup>1</sup>                  |
| 1262                                 | Ring breathing mode in thymine, adenine; =C-H bending in proteins                                      | 1263 <sup>1,2</sup>                |
| 1300                                 | CH <sub>2</sub> twisting in lipids, fatty acids                                                        | 1300 <sup>1,2</sup>                |
| 1338                                 | Amide III                                                                                              | 1338 <sup>2</sup>                  |
| 1362                                 | Tryptophan                                                                                             | 1360 <sup>1,2</sup>                |
| 1386                                 | CH <sub>3</sub> band                                                                                   | 1386 <sup>1,2</sup>                |
| 1425                                 | Deoxyribose                                                                                            | 1424 <sup>1,2</sup>                |
| 1466                                 | Lipids                                                                                                 | 1465 <sup>1,2</sup>                |
| 1473                                 | C=N stretching                                                                                         | 1470 <sup>1,2</sup>                |
| 1577                                 | Guanine, adenine                                                                                       | 1578 <sup>1</sup>                  |

\* Also present in control (hIOSE) spectrum.

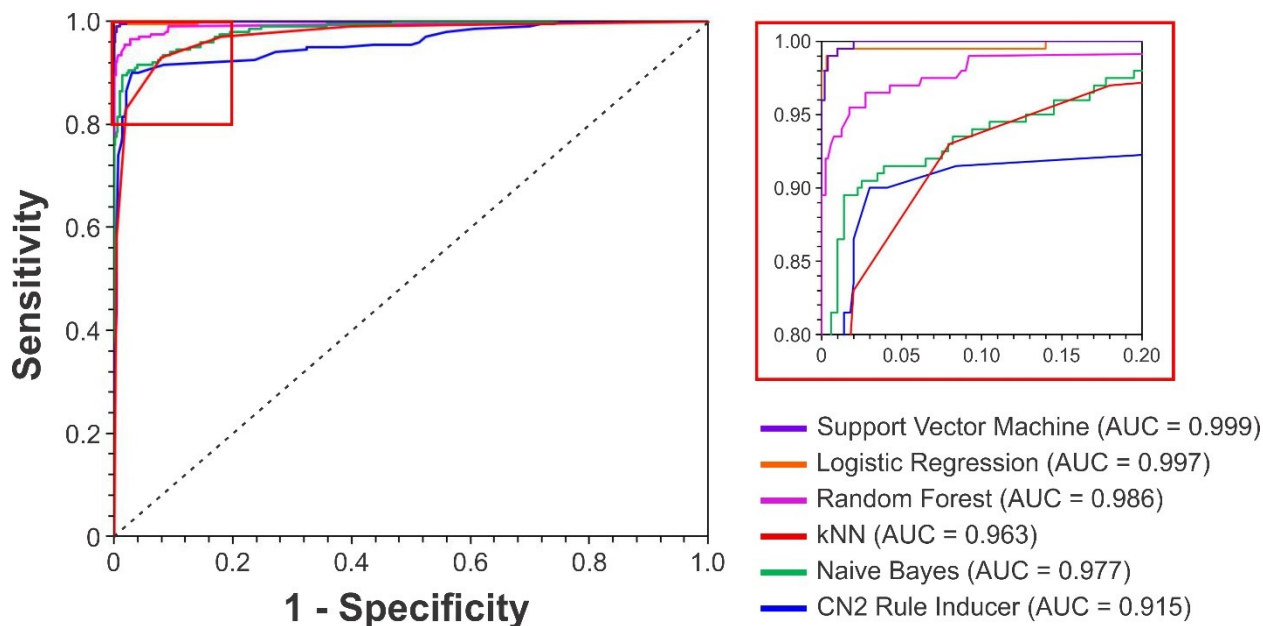

**Figure S4.** ROC curves comparing six different machine learning algorithms: support vector machine (SVM), logistic regression, random forest, kNN, Naïve Bayes, and CN2 rule inducer. The upper left-most portion is zoomed in and highlighted in red (right).

**Table S7.** Comparison of accuracies, sensitivities, and specificities achieved with the six learning machine algorithms shown in Fig. S3. Although SVM has a slightly higher AUC (0.999) than logistic regression (0.997), logistic regression is able to classify each EV type with higher accuracy, precision, and recall.

| <b>Model</b>        | <b>Accuracy</b> | <b>Precision</b> | <b>Recall</b> |
|---------------------|-----------------|------------------|---------------|
| Logistic Regression | 98.6 %          | 98.6 %           | 98.6 %        |
| SVM                 | 97.3 %          | 97.4 %           | 97.3 %        |
| Random Forest       | 91.0 %          | 91.1 %           | 91.0 %        |
| Naïve Bayes         | 86.5 %          | 88.4 %           | 86.5 %        |
| kNN                 | 86.5 %          | 87.1 %           | 86.5 %        |
| CN2 Rule Inducer    | 77.4 %          | 77.4 %           | 77.4 %        |

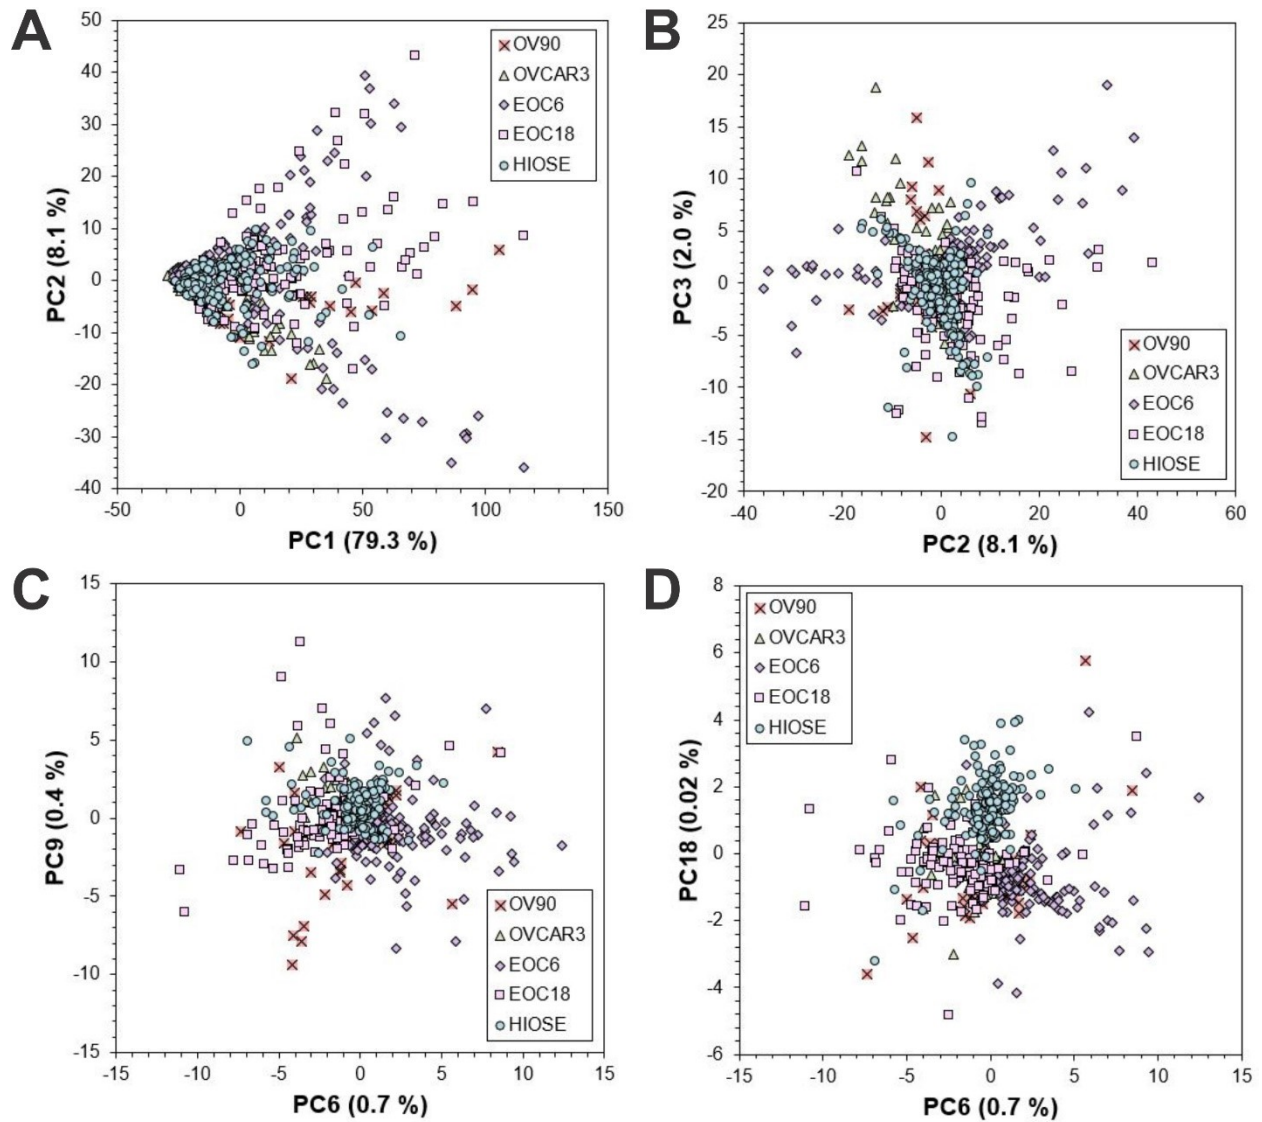

**Figure S5.** Score plots containing (A) first two PCs (i.e., a traditional score plot), (B) PC2 and PC3 (informative projection for the first 5 PCs), (C) PC6 and PC9 (informative projection for both the first 10 and 15 PCs), and (D) PC6 and PC18 (informative projection for the first 20 PCs).

**Table S8.** A comparison of the descriptive statistics when varying amounts of PCs are retained for machine learning.

| Number of PCs Retained | Total Explained Variance | Accuracy | Precision | Recall |
|------------------------|--------------------------|----------|-----------|--------|
| 5                      | 91.5 %                   | 46.3 %   | 50.6 %    | 46.3 % |
| 10                     | 94.0 %                   | 69.0 %   | 69.6 %    | 69.0 % |
| 15                     | 95.5 %                   | 69.0 %   | 69.6 %    | 69.0 % |
| 20                     | 96.5 %                   | 94.6 %   | 94.8 %    | 94.6 % |
| 25                     | 97.2 %                   | 98.6 %   | 98.6 %    | 98.6 % |

**Table S9.** Confusion matrix generated when the first 5 PCs are retained for machine learning.

|        |        | Predicted |       |       |        |       |
|--------|--------|-----------|-------|-------|--------|-------|
|        |        | EOC6      | EOC18 | OV-90 | OVCAR3 | hIOSE |
| Actual | EOC6   | 70        | 12    | 2     | 16     | 57    |
|        | EOC18  | 13        | 48    | 9     | 6      | 60    |
|        | OV-90  | 2         | 3     | 45    | 0      | 50    |
|        | OVCAR3 | 12        | 0     | 4     | 38     | 44    |
|        | hIOSE  | 21        | 22    | 8     | 30     | 119   |

**Table S10.** Confusion matrix generated when the first 15 PCs are retained for machine learning.

|        |        | Predicted |       |       |        |       |
|--------|--------|-----------|-------|-------|--------|-------|
|        |        | EOC6      | EOC18 | OV-90 | OVCAR3 | hIOSE |
| Actual | EOC6   | 133       | 3     | 4     | 4      | 13    |
|        | EOC18  | 4         | 79    | 4     | 6      | 43    |
|        | OV-90  | 1         | 3     | 74    | 4      | 18    |
|        | OVCAR3 | 5         | 2     | 12    | 58     | 21    |
|        | hIOSE  | 20        | 18    | 12    | 17     | 133   |

**Table S11.** Confusion matrix generated when the first 20 PCs are retained for machine learning.

|        |        | Predicted |       |       |        |       |
|--------|--------|-----------|-------|-------|--------|-------|
|        |        | EOC6      | EOC18 | OV-90 | OVCAR3 | hIOSE |
| Actual | EOC6   | 144       | 7     | 5     | 1      | 0     |
|        | EOC18  | 4         | 127   | 2     | 1      | 2     |
|        | OV-90  | 4         | 1     | 95    | 0      | 0     |
|        | OVCAR3 | 0         | 6     | 0     | 92     | 0     |
|        | hIOSE  | 1         | 3     | 0     | 0      | 196   |

**Table S12.** Confusion matrix generated when the first 25 PCs are retained for machine learning.

|        |        | Predicted |       |       |        |       |
|--------|--------|-----------|-------|-------|--------|-------|
|        |        | EOC6      | EOC18 | OV-90 | OVCAR3 | hIOSE |
| Actual | EOC6   | 153       | 1     | 0     | 1      | 2     |
|        | EOC18  | 0         | 134   | 1     | 1      | 0     |
|        | OV-90  | 0         | 0     | 99    | 0      | 1     |
|        | OVCAR3 | 0         | 1     | 0     | 97     | 0     |
|        | hIOSE  | 1         | 1     | 0     | 0      | 198   |

## References

1. A. C. S. Talari, Z. Movasaghi, S. Rehman and I. U. Rehman, *Appl. Spectrosc. Rev.* 2015, **50**, 46-111.
2. I. U. Rehman, Z. Movasaghi, S. Rehman, in *Vibrational Spectroscopy for Tissue Analysis*, CRC Press, Boca Raton, 2012, vol. 1, pp 213-294.
